# Supplementary material for: A Study on the Latent Classes of Adolescent Risk Behaviors
Source: Research Square preprint supplement (doi:10.21203/rs.3.rs-6616552/v1), 2025-06-25
Supplement: Supplementary file 1 [file 5ffa7adfbafc4460ec0b1c62.xlsx]

## Sheet: Sheet1
model	LL	AIC	BIC	ABIC	Entropy	BLRT	VLMR	class probability(%)
						P	P
1C	-173553	347152	347326	347253
2C	-151381	302856	303213	303063	0.963	<0.001	<0.001	17.27/82.73
3C	-144376	288894	289433	289207	0.929	<0.001	<0.001	65.65/16.17/18.18
4C	-142313	284817	285538	285236	0.863	<0.001	<0.001	13.62/17.17/14.16/55.05
5C	-140867	281972	282875	282497	0.864	<0.001	<0.001	14.41/14.29/12.50/54.32/4.48
6C	-139663	279612	280698	280244	0.866	<0.001	<0.001	3.99/53.96/6.55/7.50/13.48/14.52
BIC Steep Slope Figure
