# Supplementary material for: A Study on the Latent Classes of Adolescent Risk Behaviors
Source: Research Square preprint supplement (doi:10.21203/rs.3.rs-6616552/v1), 2025-06-25
Supplement: Supplementary file 2 [file abf8629140171c7ddc2fdc68.docx]

Table :

Summarize CCFI and Base Rate Estimates

| Program | CCFI | Base Rate Estimates |
| --- | --- | --- |
| MAMBAC | 0.506 | 0.000 |
| MAXEIG | 0.514 | 0.074 |
| L-MODE | 0.496 | 0.362 |

Note: CCFI: curve fitting index; Base Rate Estimates: the classification ratio generated by each classification quantitative program
